# Supplementary material for: Yoga and Cardiovascular Health Trial (YACHT): a UK-based randomised mechanistic study of a yoga intervention plus usual care versus usual care alone following an acute coronary event
Source: PubMed Central journal article supplement (PMC6858127; doi:10.1136/bmjopen-2019-030119), 2019-11-03
Supplement: bmjopen-2019-030119supp002.pdf [file bmjopen-2019-030119supp002.pdf]

SUPPLEMENTAL Table S1a. Characteristics at start of study (pre intervention) of those who completed/did not complete 3month follow-up: Usual care group

| Means95%CI), number(%) unless otherwise stated              | Usual Care, completed | Usual Care, dropped out             |
|-------------------------------------------------------------|-----------------------|-------------------------------------|
|                                                             | N=35                  | N=5                                 |
| Ethnicity: South Asian                                      | 22(63%)               | 4(80%)                              |
| Sex: Male                                                   | 22(63%)               | 5(100%)                             |
| Age: years                                                  | 57.2(54.0, 59.8)      | 54.5(38.3,73.6)                     |
| Days since coronary event                                   | 58(52, 65)            | 61(41,84)                           |
| Previous heart attack                                       | 5/33(15%)             | 0/5                                 |
| Diabetes, self report of physician diagnosis                | 13(37%)               | 1(20%)                              |
| Heart failure, self report of physician diagnosis           | 6/31(19%)             | 1(20%)                              |
| Hypertension, self report of physician diagnosis            | 23/33 (70%)           | 1/4(25%)                            |
| Blood pressure lowering medication*                         | 35(100%)              | 5(100%)                             |
| Number of blood pressure lowering medications*, median(IQR) | 3(2,3)                | 3(2,3)                              |
| Beta blocker use*                                           | 27(77%)               | 5(100%)                             |
| Statin use *                                                | 31(89%)               | 5(100%)                             |
| Current smoker/ex smoker/never smoker, number               | N=31<br>1/13/17       | N=5<br>0/2/3                        |
| Alcohol, never/ever drinkers, number                        | N=30<br>7/23          | 3/2                                 |
| Units/week (ever drinkers), median(IQR)                     | 2(1,6)                | 7(7,7)                              |
| Reason given for dropout                                    |                       | Refused follow-up (4)<br>Unwell (1) |

\*self-reported either pre-intervention or at follow-up

Table S1b. Characteristics at start of study (pre intervention) of those who completed/did not complete 3 month follow-up. Yoga+usual care group

| Means(95%CI), number(%) unless otherwise stated             | Yoga+usual care Completed 3 month follow-up +/- 18 sessions | Yoga+usual care Attended 3 month follow-up and at least 18 yoga sessions | Yoga+usual care Dropped out of yoga and follow-up                                                      | Yoga+usual care Attended 3 month follow-up but attended <18 yoga sessions |
|-------------------------------------------------------------|-------------------------------------------------------------|--------------------------------------------------------------------------|--------------------------------------------------------------------------------------------------------|---------------------------------------------------------------------------|
|                                                             | N=29 (4 did not complete 18 sessions)                       | N=25                                                                     | N=11                                                                                                   | N=4                                                                       |
| Ethnicity: South Asian                                      | 17(59%)                                                     | 15(60%)                                                                  | 8(73%)                                                                                                 | 2(50%)                                                                    |
| Sex: Male                                                   | 21(72%)                                                     | 18(72%)                                                                  | 7(64%)                                                                                                 | 3(75%)                                                                    |
| Age: years                                                  | 58.5(54.5, 62.5)                                            | 57.9(53.6, 62.2)                                                         | 54.5(47.9, 61.2)                                                                                       | 62.2(42.8, 81.7)                                                          |
| Days since coronary event                                   | 51(42,59)                                                   | 50±24                                                                    | 49±22                                                                                                  | 54(32,75)                                                                 |
| Previous heart attack                                       | 4/28 (14%)                                                  | 4/24(17%)                                                                | 3/7(30%)                                                                                               | 0/4                                                                       |
| Diabetes, self report of physician diagnosis                | 12(41%)                                                     | 12(41%)                                                                  | 3 (27%)                                                                                                | 3 (75%)                                                                   |
| Heart failure, self report of physician diagnosis           | 4/27(15%)                                                   | 2/23(9%)                                                                 | 3/9(33%)                                                                                               | 2(50%)                                                                    |
| Hypertension, self report of physician diagnosis            | 23/28(82%)                                                  | 19/24(79%)                                                               | 5/8(63%)                                                                                               | 4(100%)                                                                   |
| Blood pressure lowering medication*                         | 29(100%)                                                    | 25(100%)                                                                 | 10/10(100%)                                                                                            | 4(100%)                                                                   |
| Number of blood pressure lowering medications*, median(IQR) | 3(3,3)                                                      | 3(3, 3)                                                                  | 3(2,3)                                                                                                 | 3(2,4)                                                                    |
| Beta blocker use*                                           | 25(86%)                                                     | 22(88%)                                                                  | 8(73%)                                                                                                 | 3(75%)                                                                    |
| Statin use *                                                | 28(97%)                                                     | 24(96%)                                                                  | 8(73%)                                                                                                 | 4(100%)                                                                   |
| Current smoker/ex smoker, number                            | N=27<br>2/10                                                | N=23<br>2/8                                                              | 2/4                                                                                                    | 0/2                                                                       |
| Alcohol, never/ever drinkers, number                        | N=26<br>8/18                                                | N=23<br>8/15                                                             | N=10<br>5/5                                                                                            | 0/4                                                                       |
| Units/week (ever drinkers), median(IQR)                     | 2(0,5)                                                      | 2(0,4)                                                                   | 11(1,12)                                                                                               | 9(1, 20)                                                                  |
| Reason given for dropout                                    |                                                             |                                                                          | Refused follow-up (4)<br>Unwell(6)<br>Returned to work, unable to attend further classes/follow-up (1) | Refused further yoga(4)                                                   |

\*self-reported either pre-intervention or at follow-up
