# Supplementary material for: Yoga and Cardiovascular Health Trial (YACHT): a UK-based randomised mechanistic study of a yoga intervention plus usual care versus usual care alone following an acute coronary event
Source: PubMed Central journal article supplement (PMC6858127; doi:10.1136/bmjopen-2019-030119), 2019-11-03

Figure S1

## YACHT Study Recruitment

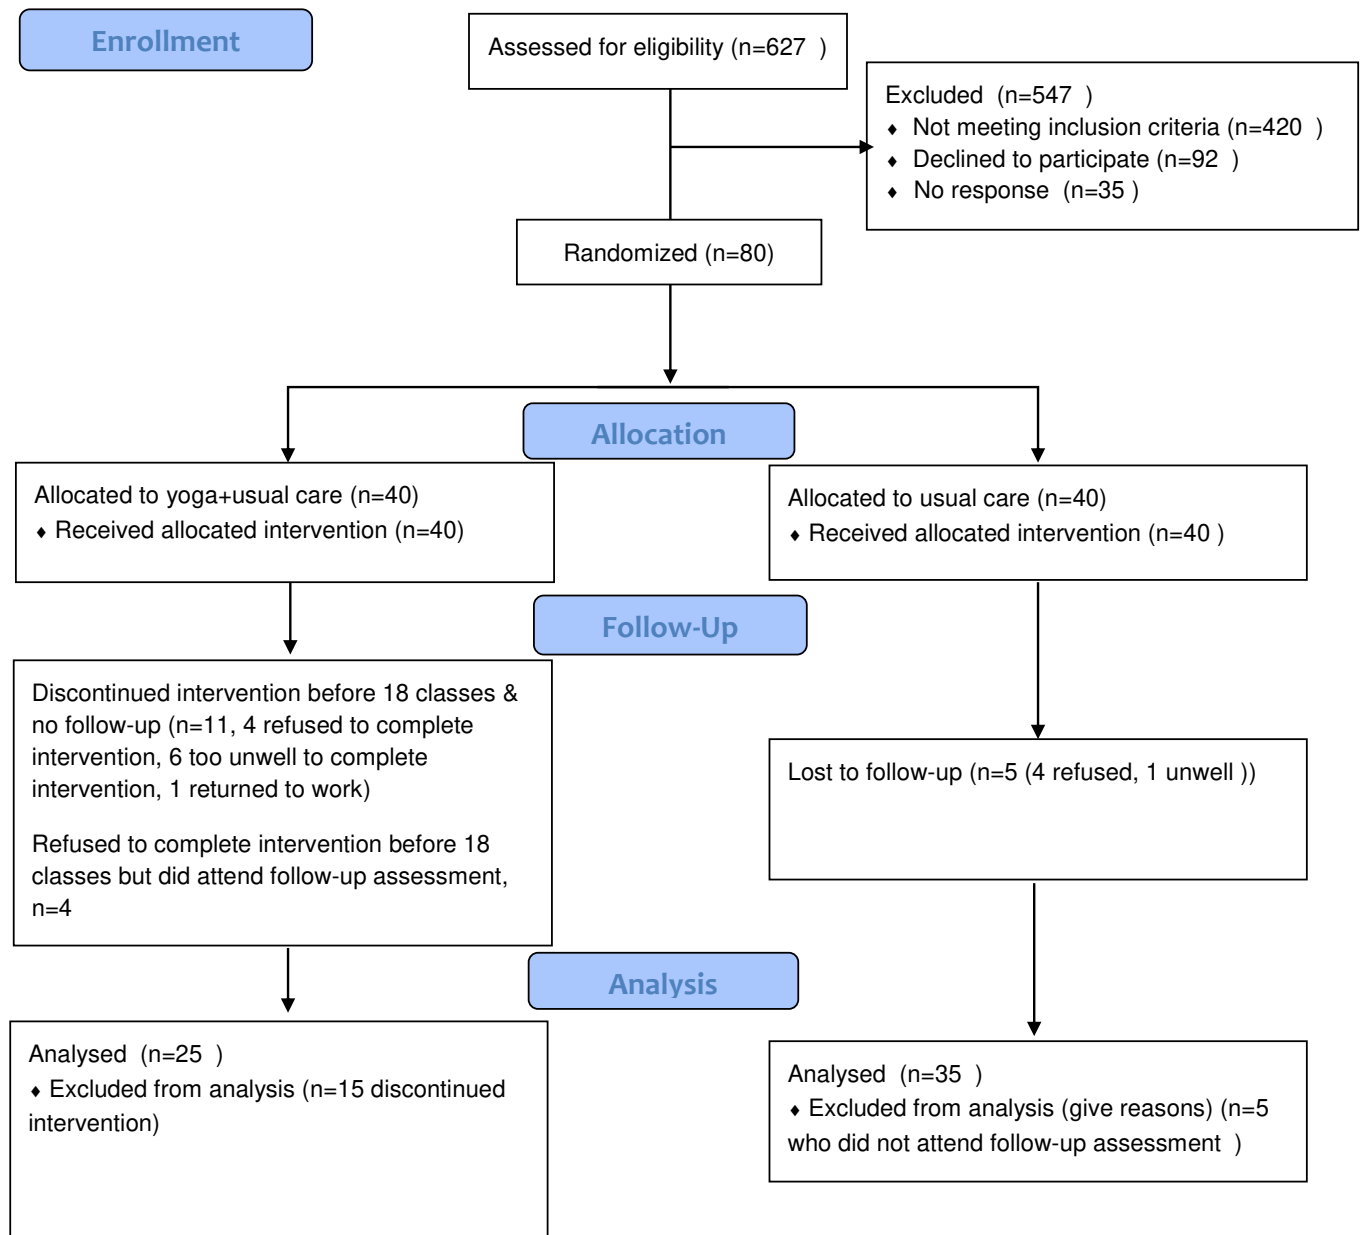

Supplement: bmjopen-2019-030119supp003.pdf [file bmjopen-2019-030119supp003.pdf]
